# Supplementary material for: The complete mitochondrial genome of Aglaia odorata, insights into its genomic structure and RNA editing sites
Source: Front Plant Sci. 2024 Mar 6;15:1362045. doi: 10.3389/fpls.2024.1362045 (PMC10950942; doi:10.3389/fpls.2024.1362045)
Supplement: Supplementary file 2 [file Table_1.xlsx]

## Sheet: Table S1
Table S1 Primers for verifying the mitogenome structure
Primer Name	Primer Sequence	Primer start	Primer end	Desired product length (bp)
F1	CCACCACCCGAATGCT	137396	137411	534
R1	GCCACAAATGATAACGAAAA	137910	137929
F2	ACCTAATTCCAGGCCG	193886	193901	548
R2	TTCCTCCTCCGTTTT	194419	194433
F3	GCATACCACCAGGGCGAAAG	204894	204913	432
R3	CAGCCACAAATGATAACG	204482	204499
F4	AGCCATAGTTATAGTGTAAGC	147454	147474	538
R4	GAAACTTGAACCCTTGTAT	147973	147991
F5	GCGGTGAGCCAGGAGTA	102254	102270	748
R5	CGGTCAAATATGCGGTA	102985	103001
F6	CGCTAGAAATCGTGGTC	109024	109040	511
R6	CCTCCGCTTCCCTTA	109520	109534
F7	AGAAATGGCTGGAAGA	387148	387163	682
R7	GCGGTAGGTCGGTAA	387815	387829
F8	AAGAAGTTCCTGGTTTGC	393601	393618	625
R8	CGTTTCAGTCGTCGTG	394210	394225

## Sheet: Table S2
Table S2 Primers for verifying the RNA editing sites
Primer Name	Primer Sequence
MZLnad4L-aF	AAGATAAGGTAATGGGTG
MZLnad4L-aR	TCGGACTCGGAAAGT
MZLatp9-oF	GAGATTGGGTTGGTGTT
MZLatp9-oR	AGAGCGGCTGAGTGAT
MZLccmFC-oF	GCGTTGTTGTTTGCG
MZLccmFC-oR	GGCTTGGCTTGGTTAGT
MZLrps10-oF	GGTAAGGAGCATGAGCG
MZLrps10-oR	AGGAAGAATAGAAAGTGGG

## Sheet: Table S3
Table S3 Annotation results of the mitogenome of A. odorata.
Genes	Start	Stop	Length	Strand	Exons	Products
atp1	305391	306917	1527	-		ATPase subunit 1
atp4	358491	358982	492	+		ATPase subunit 4
atp6	193811	194530	720	-		ATPase subunit 6
atp8	286826	287317	492	-		ATPase subunit 8
atp9	469441	469665	225	-		ATPase subunit 9
ccmB	160555	161175	621	-		cytochrome c biogenesis B
ccmC	360726	361478	753	+		cytochrome c biogenesis C
ccmFC	176000	176775	776	+	Exon1	cytochrome c biogenesis FC
	177724	178273	550	+	Exon2
ccmFN	369536	371266	1731	-		cytochrome c biogenesis FN
cob	207424	208605	1182	+		apocytochrome b
cox1	463281	464006	726	-	Exon1	cytochrome c oxidase subunit 1
	461451	462308	858	-	Exon2
cox2	32102	32801	700	+	Exon1	cytochrome c oxidase subunit 2
	34841	34923	83	+	Exon2
cox3	284812	285609	798	-		cytochrome c oxidase subunit 3
matR	272796	274769	1974	+		cytochrome c oxidase subunit 3
mttB	109824	110612	789	+		maturase R
nad1	156225	156609	385	+	Exon1	NADH dehydrogenase subunit 1
	486893	486975	83	-	Exon2
	485270	485461	192	-	Exon3
	272058	272116	59	+	Exon4
	432457	432715	259	-	Exon5
nad2	223587	223739	153	-	Exon1	NADH dehydrogenase subunit 2
	221976	222367	392	-	Exon2
	511585	511745	161	+	Exon3
	514324	514896	573	+	Exon4
	516393	516580	188	+	Exon5
nad3	136942	137298	357	-		NADH dehydrogenase subunit 3
nad4	253844	254304	461	-	Exon1	NADH dehydrogenase subunit 4
	251475	252412	938	-	Exon2
	248589	248677	89	-	Exon3
nad4L	18098	18400	303	-		NADH dehydrogenase subunit 4L
nad5	468939	469168	230	-	Exon1	NADH dehydrogenase subunit 5
	466872	468087	1216	-	Exon2
	482062	482083	22	-	Exon3
	347995	348389	395	-	Exon4
	346786	346935	150	-	Exon5
nad6	42827	43444	618	-		NADH dehydrogenase subunit 6
nad7	77063	77205	143	-	Exon1	NADH dehydrogenase subunit 7
	76098	76166	69	-	Exon2
	74095	74561	467	-	Exon3
	72778	73021	244	-	Exon4
	70704	70965	262	-	Exon5
nad9	147825	148397	573	+		NADH dehydrogenase subunit 9
rpl10	90369	90857	489	-		ribosomal protein L10
rpl16	395638	396072	435	+		ribosomal protein L16
rpl2	77799	78824	1026	-		ribosomal protein L2
rpl5	533680	534234	555	-		ribosomal protein L5
rps1	385535	386140	606	-		ribosomal protein S1
rps3	393975	395666	1692	+		ribosomal protein S3
rps4	98950	100008	1059	-		ribosomal protein S4
rps10	465175	465505	331	-	Exon1	ribosomal protein S10
	464232	464314	83	-	Exon2
rps12	136515	136892	378	-		ribosomal protein S12
sdh3	224390	224758	369	-		succinate dehydrogenase subunit 3
sdh4	284465	284884	420	-		succinate dehydrogenase subunit 4
trnS-GCU	9648	9735	88	+		tRNA-Ser
trnF-GAA	10098	10171	74	+		tRNA-Phe
trnF-GAA_copy2	40337	40408	72	+		tRNA-Phe
trnP-UGG	86917	86991	75	+		tRNA-Pro
trnI-CAU	112409	112482	74	-		tRNA-Met
trnP-GGG	149166	149242	77	+		tRNA-Pro
trnW-CCA	149400	149473	74	+		tRNA-Trp
trnK-UUU	163589	163661	73	+		tRNA-Lys
trnQ-UUG	232050	232121	72	-		tRNA-Gln
trnG-GCC	235582	235653	72	-		tRNA-Gly
trnM-CAU	247493	247565	73	-		tRNA-Met
trnD-GUC	257583	257656	74	+		tRNA-Asn
trnS-UGA	265008	265094	87	+		tRNA-Ser
trnW-CCA_copy2	295154	295235	82	+		tRNA-Trp
trnP-CGG	371417	371457	41	-	Exon1	tRNA-Pro
	371330	371381	52	-	Exon2
trnfM-CAU	407454	407527	74	-		tRNA-Met
trnC-GCA	507591	507661	71	+		tRNA-Cys
trnN-GUU	509798	509869	72	+		tRNA-Asn
trnY-GUA	510968	511050	83	+		tRNA-Tyr
trnE-UUC	519804	519875	72	+		tRNA-Glu
trnE-UUC_copy2	523262	523333	72	-		tRNA-Glu
trnH-GUG	525870	525943	74	+		tRNA-His
rrn18	326918	328865	1948	+		18S ribosomal RNA
rrn5	329482	329599	118	+		5S ribosomal RNA
rrn26	407892	411005	3114	-		26S ribosomal RNA

## Sheet: Table S4
Table S4 SSRs identified in the mitogenome of A. odorata.
SSR nr.	SSR type	SSR	size	start	end	end
1	p2	(TA)6	12	4796	4807	4807
2	p3	(TAT)4	12	4806	4817	4817
3	p4	(CTAT)3	12	6169	6180	6180
4	p4	(TTGC)3	12	9158	9169	9169
5	p3	(TTC)4	12	12959	12970	12970
6	p4	(ATTG)4	16	16752	16767	16767
7	p5	(TTTCT)3	15	17814	17828	17828
8	p1	(T)11	11	21086	21096	21096
9	p3	(TAA)4	12	28045	28056	28056
10	p3	(TAA)5	15	34297	34311	34311
11	p4	(AGCA)3	12	34329	34340	34340
12	p5	(ATATA)6	30	36994	37023	37023
13	p4	(AATC)3	12	40700	40711	40711
14	p4	(AGGA)3	12	54539	54550	54550
15	p3	(GAA)4	12	55221	55232	55232
16	p6	(TCTTCC)3	18	60623	60640	60640
17	p6	(TTAAAC)3	18	65223	65240	65240
18	p3	(CTT)4	12	67649	67660	67660
19	p2	(TA)5	10	71488	71497	71497
20	p1	(T)10	10	73642	73651	73651
21	p4	(GGTC)3	12	76828	76839	76839
22	p4	(CAAC)3	12	79096	79107	79107
23	p4	(TAAG)3	12	83903	83914	83914
24	p3	(CTT)4	12	85507	85518	85518
25	p4	(AACT)3	12	85955	85966	85966
26	p1	(T)12	12	87129	87140	87140
27	p2	(TC)6	12	88424	88435	88435
28	p4	(CCGG)3	12	92632	92643	92643
29	p4	(GGAA)3	12	94303	94314	94314
30	p1	(A)10	10	98530	98539	98539
31	p1	(A)10	10	98799	98808	98808
32	p2	(TA)5	10	99168	99177	99177
33	p4	(TGAC)3	12	102864	102875	102875
34	p4	(AGAA)3	12	107302	107313	107313
35	p5	(AAGTC)4	20	109107	109126	109126
36	p6	(GTGAAG)3	18	109323	109340	109340
37	p2	(AT)5	10	109818	109827	109827
38	p2	(CT)5	10	110900	110909	110909
39	p1	(A)14	14	111059	111072	111072
40	p2	(GA)5	10	111081	111090	111090
41	p1	(T)12	12	111515	111526	111526
42	p2	(AT)12	24	112655	112678	112678
43	p4	(CGGG)3	12	113268	113279	113279
44	p1	(A)11	11	114067	114077	114077
45	p4	(GAAT)3	12	119528	119539	119539
46	p4	(CTTT)3	12	119776	119787	119787
47	p3	(CAG)4	12	119862	119873	119873
48	p4	(TCTT)4	16	120166	120181	120181
49	p5	(AGCAA)3	15	134372	134386	134386
50	p4	(CCGC)3	12	139245	139256	139256
51	p4	(CTTC)3	12	143974	143985	143985
52	p4	(TTTC)3	12	146578	146589	146589
53	p4	(TAAG)3	12	149009	149020	149020
54	p1	(A)10	10	150198	150207	150207
55	p5	(TATTA)3	15	150685	150699	150699
56	p4	(AAAG)3	12	150993	151004	151004
57	p3	(TCT)4	12	152801	152812	152812
58	p2	(AT)12	24	155409	155432	155432
59	p4	(AAGG)3	12	155485	155496	155496
60	p1	(T)10	10	156872	156881	156881
61	p1	(A)10	10	156900	156909	156909
62	p5	(TATAC)3	15	159660	159674	159674
63	p3	(TAT)4	12	160389	160400	160400
64	p4	(GTGA)3	12	161668	161679	161679
65	p3	(AGA)5	15	163522	163536	163536
66	p5	(CAAAT)3	15	164051	164065	164065
67	p2	(AT)5	10	164067	164076	164076
68	p3	(AAG)5	15	165414	165428	165428
69	p3	(AAG)4	12	167295	167306	167306
70	p1	(T)11	11	167656	167666	167666
71	p3	(CTA)4	12	171724	171735	171735
72	p3	(ACT)4	12	171767	171778	171778
73	p1	(A)10	10	174418	174427	174427
74	p2	(TA)9	18	180877	180894	180894
75	p2	(GA)5	10	185770	185779	185779
76	p1	(A)10	10	188503	188512	188512
77	p3	(AGT)4	12	192678	192689	192689
78	p4	(GAAA)3	12	195824	195835	195835
79	p4	(GAAG)3	12	198428	198439	198439
80	p4	(GCGG)3	12	203157	203168	203168
81	p2	(TA)6	12	207331	207342	207342
82	p4	(CGGT)3	12	211973	211984	211984
83	p4	(GAAA)3	12	213291	213302	213302
84	p3	(TAT)4	12	213593	213604	213604
85	p3	(TCT)4	12	216223	216234	216234
86	p4	(GAAA)3	12	216327	216338	216338
87	p2	(TA)6	12	217859	217870	217870
88	p4	(ATAG)3	12	221902	221913	221913
89	p5	(TTACG)3	15	223797	223811	223811
90	p1	(A)11	11	224043	224053	224053
91	p1	(T)10	10	224355	224364	224364
92	p1	(A)10	10	225344	225353	225353
93	p4	(ATTA)3	12	226495	226506	226506
94	p4	(AGTC)3	12	227630	227641	227641
95	p3	(TCA)4	12	228983	228994	228994
96	p3	(TCT)4	12	229652	229663	229663
97	p4	(AAAG)3	12	231162	231173	231173
98	p4	(TCGG)3	12	233015	233026	233026
99	p3	(CCT)4	12	233342	233353	233353
100	p4	(GCTA)3	12	235334	235345	235345
101	p1	(G)10	10	235782	235791	235791
102	p2	(CT)5	10	247262	247271	247271
103	p5	(GTCTG)3	15	249714	249728	249728
104	p2	(TC)5	10	252883	252892	252892
105	p2	(AT)5	10	259668	259677	259677
106	p1	(T)10	10	260011	260020	260020
107	p1	(T)10	10	263579	263588	263588
108	p2	(GA)5	10	263726	263735	263735
109	p2	(GA)5	10	269568	269577	269577
110	p2	(AT)7	14	270982	270995	270995
111	p3	(ATC)4	12	271421	271432	271432
112	p1	(T)10	10	272077	272086	272086
113	p5	(CTAGT)3	15	274756	274770	274770
114	p4	(AACC)3	12	278005	278016	278016
115	p4	(GGAC)3	12	280005	280016	280016
116	p5	(TTATA)3	15	282858	282872	282872
117	p1	(T)10	10	299945	299954	299954
118	p2	(AC)5	10	314307	314316	314316
119	p4	(TATT)3	12	314359	314370	314370
120	p2	(AT)5	10	316775	316784	316784
121	p5	(TAAAG)7	35	323792	323826	323826
122	p5	(TACCT)5	25	324542	324566	324566
123	p3	(TTA)4	12	329323	329334	329334
124	p4	(GGCG)3	12	329381	329392	329392
125	p4	(TCAA)3	12	333699	333710	333710
126	p5	(AGGAA)3	15	335653	335667	335667
127	p2	(TA)5	10	337574	337583	337583
128	p1	(T)11	11	339053	339063	339063
129	p1	(T)11	11	339710	339720	339720
130	p1	(A)10	10	342958	342967	342967
131	p3	(GGT)4	12	344178	344189	344189
132	p4	(CATC)3	12	344732	344743	344743
133	p1	(T)10	10	345595	345604	345604
134	p2	(CT)5	10	351990	351999	351999
135	p5	(TGTTA)3	15	353992	354006	354006
136	p4	(AAGT)3	12	354161	354172	354172
137	p3	(AAG)4	12	354560	354571	354571
138	p1	(T)11	11	360545	360555	360555
139	p4	(AAGA)3	12	369162	369173	369173
140	p4	(AGAA)3	12	373314	373325	373325
141	p2	(TA)7	14	373445	373458	373458
142	p2	(TA)7	14	373462	373475	373475
143	p1	(T)10	10	374329	374338	374338
144	p4	(AGGC)3	12	378446	378457	378457
145	p4	(TTCT)3	12	378624	378635	378635
146	p3	(GAA)4	12	385765	385776	385776
147	p4	(AAAT)3	12	386207	386218	386218
148	p4	(TGAC)3	12	387703	387714	387714
149	p4	(AGAA)3	12	392141	392152	392152
150	p5	(AAGTC)4	20	393946	393965	393965
151	p4	(CATT)3	12	394180	394191	394191
152	p1	(T)12	12	396198	396209	396209
153	p3	(AAT)4	12	410631	410642	410642
154	p5	(TTTAT)3	15	422548	422562	422562
155	p3	(AGA)4	12	425190	425201	425201
156	p4	(GATT)3	12	426994	427005	427005
157	p4	(ATCA)3	12	427885	427896	427896
158	p2	(AC)7	14	428725	428738	428738
159	p4	(CTTC)3	12	430451	430462	430462
160	p2	(TC)5	10	432312	432321	432321
161	p4	(TATT)3	12	434770	434781	434781
162	p2	(TC)5	10	445927	445936	445936
163	p6	(TACTCC)3	18	446815	446832	446832
164	p1	(A)10	10	453784	453793	453793
165	p1	(G)10	10	464114	464123	464123
166	p1	(C)10	10	464344	464353	464353
167	p4	(CGGC)3	12	466207	466218	466218
168	p5	(ATCTG)3	15	472262	472276	472276
169	p1	(A)10	10	476383	476392	476392
170	p4	(CAAC)3	12	481061	481072	481072
171	p3	(TCC)4	12	482967	482978	482978
172	p4	(GCTA)3	12	484136	484147	484147
173	p4	(AGAT)3	12	488929	488940	488940
174	p1	(A)10	10	490599	490608	490608
175	p2	(TA)5	10	493262	493271	493271
176	p1	(A)10	10	495754	495763	495763
177	p1	(T)10	10	503768	503777	503777
178	p4	(AGAA)3	12	505514	505525	505525
179	p1	(T)10	10	505556	505565	505565
180	p1	(T)10	10	511134	511143	511143
181	p1	(A)11	11	512203	512213	512213
182	p1	(A)10	10	512921	512930	512930
183	p1	(T)10	10	513133	513142	513142
184	p6	(TTCCTA)3	18	519659	519676	519676
185	p1	(A)11	11	523609	523619	523619
186	p4	(TTAA)4	16	523748	523763	523763
187	p4	(TAAT)3	12	523787	523798	523798
188	p4	(AAGA)3	12	524770	524781	524781
189	p4	(GATA)4	16	524934	524949	524949
190	p4	(ATAA)3	12	525386	525397	525397
191	p2	(AG)7	14	527482	527495	527495
192	p4	(TTAC)3	12	528772	528783	528783

## Sheet: Table S5
Table S5 Tandem repeat sequences in the mitochondrial genome of A. odorata
Serial numbers	Indices	Period	Copy	Consensus	Percent	Percent	Score	A	C	G	T	Entropy
		Size	Number	Size	Matches	Indels						(0-2)
1	83883--83912	14	2.1	14	100	0	60	50	0	13	36	1.42
2	106444--106488	21	2	22	87	8	65	42	8	33	15	1.78
3	112862--112890	12	2.3	13	94	5	51	79	0	6	13	0.93
4	132949--132975	14	1.9	14	100	0	54	25	22	14	37	1.93
5	139852--139907	28	2	28	85	0	76	21	23	17	37	1.94
6	154798--154836	19	2.1	19	100	0	78	48	10	15	25	1.76
7	157086--157115	15	2	15	93	0	51	30	0	33	36	1.58
8	202506--202561	28	2	28	85	0	76	37	17	23	21	1.94
9	219567--219606	18	2.2	19	86	13	57	55	15	25	5	1.6
10	238075--238201	63	2	63	87	0	182	33	16	17	33	1.92
11	238458--238544	42	2.1	42	84	4	113	24	28	16	31	1.96
12	240537--240588	21	2.5	21	83	0	59	11	21	17	50	1.77
13	258569--258602	16	2.1	16	88	0	50	41	2	14	41	1.61
14	258566--258608	22	2	22	85	0	59	41	4	13	39	1.66
15	308404--308450	18	2.6	18	89	0	76	19	29	17	34	1.94
16	314239--314286	14	3.6	14	81	15	50	27	4	0	68	1.07
17	314663--314733	28	2.4	30	86	9	94	43	11	2	42	1.55
18	341447--341488	16	2.7	15	85	7	57	30	38	23	7	1.82
19	391283--391327	21	2	22	87	8	65	42	8	33	15	1.78
20	401297--401361	32	2	32	93	0	112	18	41	7	32	1.79
21	409190--409232	18	2.4	18	81	18	54	34	25	20	18	1.96
22	413173--413208	18	2	18	100	0	72	16	11	16	55	1.68
23	424410--424467	27	2.1	27	87	0	80	24	20	34	20	1.97
24	425913--425943	16	1.9	16	93	0	53	9	19	35	35	1.85
25	442318--442352	13	2.7	13	90	0	52	22	11	51	14	1.74
26	443113--443147	18	1.9	18	94	0	61	42	25	20	11	1.85
27	470409--470445	19	1.9	19	94	0	65	13	32	16	37	1.87
28	473251--473291	20	2	20	100	0	82	46	19	24	9	1.8
29	523753--523800	17	2.8	17	93	0	87	54	0	4	41	1.2

## Sheet: Table S6
Table S6 Dispersed repeat sequences in the mitochondrial genome of A. odorata
Serial numbers	The repeat length of the first part	The starting site of the first part	Matching direction	The repeat length of the second part	The starting site of the second part	Interval distance of repeats	E-value
1	10113	137691	P	10113	194608	0	0
2	6621	102560	F	6621	387399	0	0
3	189	287412	F	189	307204	0	1.3e-103
4	198	74817	P	198	512550	-3	1.71e-101
5	182	91395	P	182	455164	0	2.14e-99
6	167	74848	P	167	512550	0	2.29e-90
7	160	77756	P	160	275191	-1	1.8e-83
8	160	137197	F	160	346395	-3	6.8e-79
9	138	90586	F	138	432870	0	6.61e-73
10	137	77779	P	137	275191	0	2.65e-72
11	131	287308	P	131	358290	-1	4.26e-66
12	132	224748	F	132	287307	-2	2.11e-64
13	128	31873	F	128	368470	-1	2.66e-64
14	133	224749	P	133	358288	-3	7.01e-63
15	124	137233	F	124	346431	-2	1.22e-59
16	118	328889	F	118	485029	-1	2.57e-58
17	97	327225	P	97	398095	0	3.2e-48
18	94	328913	F	94	485053	0	2.05e-46
19	93	90851	F	93	534228	0	8.19e-46
20	82	31919	F	82	368516	0	3.43e-39
21	79	44303	P	79	86548	0	2.2e-37
22	78	248308	P	78	329224	-1	2.06e-34
23	80	519796	P	80	523260	-2	1.56e-33
24	76	101271	F	76	116559	-1	3.21e-33
25	72	144641	F	72	470389	-2	8.28e-29
26	72	197699	P	72	470389	-2	8.28e-29
27	75	277598	P	75	450577	-3	1.03e-28
28	63	137294	F	63	346492	-1	1.78e-25
29	65	156141	F	65	527309	-2	1.1e-24
30	61	173667	F	61	348888	-1	2.76e-24
31	60	279225	F	60	407801	-1	1.09e-23
32	60	519816	P	60	523260	-1	1.09e-23
33	66	26461	P	66	489790	-3	1.82e-23
34	60	262486	P	60	329124	-2	9.62e-22
35	59	295340	F	59	379883	-2	3.72e-21
36	62	26470	P	62	489785	-3	3.86e-21
37	52	277621	P	52	450577	0	3.96e-21
38	58	432377	F	58	469279	-2	1.44e-20
39	61	3414	F	61	187175	-3	1.47e-20
40	51	197720	P	51	470389	0	1.58e-20
41	60	78816	F	60	482849	-3	5.58e-20
42	50	262540	P	50	329055	0	6.33e-20
43	49	222381	F	49	485472	0	2.53e-19
44	52	32187	P	52	287429	-1	6.18e-19
45	52	32187	P	52	307221	-1	6.18e-19
46	52	484147	F	52	525462	-1	6.18e-19
47	51	100963	F	51	235431	-1	2.42e-18
48	54	91332	P	54	326821	-2	3.19e-18
49	47	410988	F	47	469781	0	4.05e-18
50	50	438616	F	50	475945	-1	9.5e-18
51	46	43548	F	46	98389	0	1.62e-17
52	49	32236	P	49	305300	-1	3.72e-17
53	49	432386	F	49	469288	-1	3.72e-17
54	49	464646	P	49	531158	-1	3.72e-17
55	55	32220	P	55	305310	-3	4.38e-17
56	55	86609	F	55	368236	-3	4.38e-17
57	45	183624	P	45	456776	0	6.49e-17
58	54	93608	P	54	409619	-3	1.66e-16
59	44	120507	P	44	164763	0	2.59e-16
60	44	238221	P	44	246101	0	2.59e-16
61	47	432494	F	47	483928	-1	5.72e-16
62	47	448217	F	47	506439	-1	5.72e-16
63	53	3404	F	53	187165	-3	6.26e-16
64	53	26489	P	53	489775	-3	6.26e-16
65	50	3425	F	50	187186	-2	6.98e-16
66	49	224843	F	49	386620	-2	2.68e-15
67	42	63120	F	42	433832	0	4.15e-15
68	42	356701	P	42	456067	0	4.15e-15
69	42	484157	F	42	525472	0	4.15e-15
70	48	100125	F	48	464643	-2	1.03e-14
71	40	100097	F	40	100974	0	6.64e-14
72	40	148745	F	40	478558	0	6.64e-14
73	40	262568	F	40	328217	0	6.64e-14
74	46	72139	F	46	100170	-2	1.51e-13
75	46	74797	P	46	512722	-2	1.51e-13
76	39	34467	F	39	72078	0	2.66e-13
77	39	402460	F	39	466531	0	2.66e-13
78	42	156164	F	42	527332	-1	5.23e-13
79	41	72078	F	41	407617	-1	2.04e-12
80	41	165100	F	41	215596	-1	2.04e-12
81	41	373439	P	41	373439	-1	2.04e-12
82	41	438567	F	41	475904	-1	2.04e-12
83	44	156868	P	44	156868	-2	2.21e-12
84	37	15711	P	37	90006	0	4.25e-12
85	37	93625	P	37	409619	0	4.25e-12
86	37	432398	F	37	469300	0	4.25e-12
87	40	100097	F	40	235442	-1	7.97e-12
88	43	91286	P	43	326878	-2	8.43e-12
89	43	206444	P	43	481483	-2	8.43e-12
90	43	336443	P	43	446731	-2	8.43e-12
91	36	121669	F	36	225908	0	1.7e-11
92	36	148707	F	36	347679	0	1.7e-11
93	45	100128	P	45	531162	-3	2.49e-11
94	39	34467	F	39	407617	-1	3.11e-11
95	42	304600	P	42	328820	-2	3.22e-11
96	35	265344	P	35	351851	0	6.8e-11
97	44	295394	F	44	379942	-3	9.28e-11
98	38	275443	P	38	464080	-1	1.21e-10
99	41	32190	P	41	305354	-2	1.23e-10
100	34	5302	F	34	228557	0	2.72e-10
101	34	137323	F	34	346521	0	2.72e-10
102	34	164054	P	34	164054	0	2.72e-10
103	34	224846	F	34	287405	0	2.72e-10
104	34	248499	F	34	347706	0	2.72e-10
105	34	385836	F	34	385893	0	2.72e-10
106	34	530643	P	34	532896	0	2.72e-10
107	40	150932	P	40	333064	-2	4.66e-10
108	40	173666	F	40	407640	-2	4.66e-10
109	40	258559	P	40	258559	-2	4.66e-10
110	40	271312	P	40	285763	-2	4.66e-10
111	40	287604	F	40	411011	-2	4.66e-10
112	40	314362	F	40	314473	-2	4.66e-10
113	37	3438	F	37	187199	-1	4.72e-10
114	33	98737	P	33	99965	0	1.09e-09
115	42	242464	P	42	318675	-3	1.29e-09
116	42	287397	F	42	386615	-3	1.29e-09
117	39	238084	F	39	238147	-2	1.77e-09
118	36	224846	P	36	358288	-1	1.84e-09
119	32	34499	F	32	121971	0	4.35e-09
120	32	121967	F	32	173674	0	4.35e-09
121	32	438576	F	32	475913	0	4.35e-09
122	41	227733	P	41	295904	-3	4.78e-09
123	41	287437	F	41	305354	-3	4.78e-09
124	41	305354	F	41	307229	-3	4.78e-09
125	41	411858	P	41	461160	-3	4.78e-09
126	38	34499	F	38	407652	-2	6.72e-09
127	38	112647	P	38	112647	-2	6.72e-09
128	35	119809	P	35	481083	-1	7.14e-09
129	35	336451	P	35	446731	-1	7.14e-09
130	31	100106	F	31	235451	0	1.74e-08
131	31	100983	F	31	235451	0	1.74e-08
132	31	112651	R	31	112651	0	1.74e-08
133	31	165110	F	31	215606	0	1.74e-08
134	31	168392	F	31	335266	0	1.74e-08
135	31	314376	F	31	314436	0	1.74e-08
136	31	323791	F	31	323796	0	1.74e-08
137	40	72101	F	40	173666	-3	1.77e-08
138	40	358288	P	40	386619	-3	1.77e-08
139	37	5808	F	37	439289	-2	2.55e-08
140	34	137321	P	34	360570	-1	2.77e-08
141	39	9116	P	39	259891	-3	6.56e-08
142	39	348888	F	39	407641	-3	6.56e-08
143	39	401396	F	39	402600	-3	6.56e-08
144	30	36993	R	30	36993	0	6.96e-08
145	30	295369	F	30	379912	0	6.96e-08
146	30	409366	F	30	446609	0	6.96e-08
147	30	509326	F	30	525181	0	6.96e-08
148	36	38811	P	36	240320	-2	9.64e-08
149	36	121967	F	36	407648	-2	9.64e-08
150	36	295331	F	36	379874	-2	9.64e-08
151	36	433271	F	36	531353	-2	9.64e-08
152	33	35009	P	33	235524	-1	1.08e-07
153	33	56320	F	33	511085	-1	1.08e-07
154	33	93140	P	33	105121	-1	1.08e-07
155	33	93140	P	33	389960	-1	1.08e-07
156	33	152566	P	33	533163	-1	1.08e-07
157	33	262513	P	33	329124	-1	1.08e-07
158	33	299150	P	33	345123	-1	1.08e-07
159	38	149434	F	38	295196	-3	2.42e-07
160	35	287507	F	35	305421	-2	3.64e-07
161	35	305421	F	35	307299	-2	3.64e-07
162	32	35015	F	32	407741	-1	4.18e-07
163	32	90916	F	32	482900	-1	4.18e-07
164	32	121967	F	32	348895	-1	4.18e-07
165	32	295406	F	32	379954	-1	4.18e-07
166	32	314370	F	32	314481	-1	4.18e-07
167	32	346521	P	32	360570	-1	4.18e-07
168	34	29544	F	34	260071	-2	1.37e-06
169	34	114567	P	34	514470	-2	1.37e-06
170	34	139895	F	34	139934	-2	1.37e-06
171	34	139895	P	34	202444	-2	1.37e-06
172	34	139934	P	34	202483	-2	1.37e-06
173	34	154627	P	34	446386	-2	1.37e-06
174	34	202444	F	34	202483	-2	1.37e-06
175	31	20829	P	31	266823	-1	1.62e-06
176	31	35479	F	31	49121	-1	1.62e-06
177	31	49068	F	31	359009	-1	1.62e-06
178	31	51780	F	31	311645	-1	1.62e-06
179	31	174567	F	31	484307	-1	1.62e-06
180	36	72109	F	36	121967	-3	3.28e-06
181	36	93369	P	36	104890	-3	3.28e-06
182	36	93369	P	36	389729	-3	3.28e-06
183	36	209282	F	36	345265	-3	3.28e-06
184	36	277582	P	36	450632	-3	3.28e-06
185	36	469086	F	36	488010	-3	3.28e-06
186	33	72100	P	33	100124	-2	5.17e-06
187	33	112645	C	33	112646	-2	5.17e-06
188	33	155397	F	33	155399	-2	5.17e-06
189	33	213662	P	33	365199	-2	5.17e-06
190	33	258572	R	33	258572	-2	5.17e-06
191	33	326970	F	33	493093	-2	5.17e-06
192	33	401296	F	33	401328	-2	5.17e-06
193	30	9040	P	30	510491	-1	6.27e-06
194	30	32201	P	30	305354	-1	6.27e-06
195	30	34499	F	30	173678	-1	6.27e-06
196	30	106033	F	30	496425	-1	6.27e-06
197	30	173666	F	30	432018	-1	6.27e-06
198	30	206411	P	30	481884	-1	6.27e-06
199	30	235524	P	30	407738	-1	6.27e-06
200	30	327348	F	30	378126	-1	6.27e-06
201	30	390872	F	30	496425	-1	6.27e-06
202	30	434148	F	30	434543	-1	6.27e-06
203	30	464666	P	30	531157	-1	6.27e-06
204	35	155397	P	35	373435	-3	1.2e-05
205	35	170423	P	35	456596	-3	1.2e-05
206	35	186787	F	35	402749	-3	1.2e-05
207	35	242386	P	35	318763	-3	1.2e-05
208	35	358297	P	35	386615	-3	1.2e-05
209	32	27846	P	32	101039	-2	1.94e-05
210	32	112650	F	32	155402	-2	1.94e-05
211	32	154816	F	32	206547	-2	1.94e-05
212	32	186109	F	32	334301	-2	1.94e-05
213	32	287604	F	32	469804	-2	1.94e-05
214	34	72102	F	34	348888	-3	4.4e-05
215	34	155397	C	34	155398	-3	4.4e-05
216	34	193290	F	34	212949	-3	4.4e-05
217	34	276034	P	34	326950	-3	4.4e-05
218	34	368365	F	34	526844	-3	4.4e-05
219	31	36995	R	31	36995	-2	7.29e-05
220	31	77691	P	31	493889	-2	7.29e-05
221	31	100145	F	31	464663	-2	7.29e-05
222	31	112650	C	31	155403	-2	7.29e-05
223	31	112651	R	31	155403	-2	7.29e-05
224	31	190818	P	31	206652	-2	7.29e-05
225	31	235471	F	31	464614	-2	7.29e-05
226	31	307204	P	31	358286	-2	7.29e-05
227	31	348888	F	31	432019	-2	7.29e-05
228	31	523752	F	31	523769	-2	7.29e-05
229	33	9042	F	33	248475	-3	0.00016
230	33	25840	F	33	492507	-3	0.00016
231	33	34499	F	33	72113	-3	0.00016
232	33	235524	F	33	347778	-3	0.00016
233	33	333562	P	33	517459	-3	0.00016
234	33	355141	F	33	433406	-3	0.00016
235	33	432381	F	33	483904	-3	0.00016
236	33	469283	F	33	483904	-3	0.00016
237	30	6005	P	30	424869	-2	0.000273
238	30	31974	F	30	147710	-2	0.000273
239	30	31974	P	30	194672	-2	0.000273
240	30	34499	F	30	348899	-2	0.000273
241	30	36991	F	30	36996	-2	0.000273
242	30	101040	P	30	262531	-2	0.000273
243	30	112650	F	30	155404	-2	0.000273
244	30	112652	P	30	112652	-2	0.000273
245	30	112652	P	30	155404	-2	0.000273
246	30	137328	P	30	329712	-2	0.000273
247	30	148712	P	30	178540	-2	0.000273
248	30	155404	P	30	155404	-2	0.000273
249	30	178541	P	30	347683	-2	0.000273
250	30	224853	F	30	307204	-2	0.000273
251	30	232472	P	30	232472	-2	0.000273
252	30	241881	P	30	319273	-2	0.000273
253	30	248273	P	30	525425	-2	0.000273
254	30	269293	F	30	343918	-2	0.000273
255	30	270973	P	30	270973	-2	0.000273
256	30	304613	P	30	328819	-2	0.000273
257	30	314436	F	30	314487	-2	0.000273
258	30	321955	P	30	404179	-2	0.000273
259	30	328917	P	30	525512	-2	0.000273
260	30	329712	F	30	360567	-2	0.000273
261	30	332507	F	30	337933	-2	0.000273
262	30	373445	R	30	373445	-2	0.000273
263	30	485057	P	30	525512	-2	0.000273
264	30	510766	P	30	524468	-2	0.000273
265	32	15551	P	32	433093	-3	0.000583
266	32	35016	P	32	347772	-3	0.000583
267	32	72100	P	32	464643	-3	0.000583
268	32	100128	F	32	347610	-3	0.000583
269	32	101006	P	32	262560	-3	0.000583
270	32	105509	P	32	475904	-3	0.000583
271	32	112647	P	32	180870	-3	0.000583
272	32	155397	C	32	155400	-3	0.000583
273	32	227813	P	32	295833	-3	0.000583
274	32	390348	P	32	475904	-3	0.000583
275	32	417421	P	32	443926	-3	0.000583
276	31	18498	F	31	18962	-3	0.00211
277	31	75634	F	31	468470	-3	0.00211
278	31	78385	P	31	511287	-3	0.00211
279	31	78390	P	31	484238	-3	0.00211
280	31	86526	F	31	368136	-3	0.00211
281	31	100145	P	31	531159	-3	0.00211
282	31	105516	P	31	438561	-3	0.00211
283	31	133503	F	31	354212	-3	0.00211
284	31	235362	P	31	525361	-3	0.00211
285	31	248472	P	31	510491	-3	0.00211
286	31	257761	F	31	516146	-3	0.00211
287	31	264308	F	31	270786	-3	0.00211
288	31	322874	P	31	403599	-3	0.00211
289	31	329711	P	31	346526	-3	0.00211
290	31	333199	P	31	517757	-3	0.00211
291	31	345442	F	31	432391	-3	0.00211
292	31	390355	P	31	438561	-3	0.00211
293	30	3458	F	30	187219	-3	0.00763
294	30	5513	P	30	322836	-3	0.00763
295	30	24732	P	30	278752	-3	0.00763
296	30	27772	F	30	464617	-3	0.00763
297	30	32290	P	30	305271	-3	0.00763
298	30	75743	F	30	480812	-3	0.00763
299	30	86962	P	30	371328	-3	0.00763
300	30	101008	P	30	148705	-3	0.00763
301	30	101008	F	30	329055	-3	0.00763
302	30	112650	C	30	155401	-3	0.00763
303	30	112653	R	30	155404	-3	0.00763
304	30	112659	F	30	180876	-3	0.00763
305	30	144806	P	30	502113	-3	0.00763
306	30	149443	F	30	295205	-3	0.00763
307	30	155395	F	30	373445	-3	0.00763
308	30	155397	C	30	373450	-3	0.00763
309	30	158816	P	30	250222	-3	0.00763
310	30	173702	F	30	348923	-3	0.00763
311	30	176603	P	30	273361	-3	0.00763
312	30	190870	P	30	206592	-3	0.00763
313	30	190936	P	30	206493	-3	0.00763
314	30	197577	F	30	502114	-3	0.00763
315	30	215416	F	30	279576	-3	0.00763
316	30	215704	P	30	353494	-3	0.00763
317	30	224716	F	30	461798	-3	0.00763
318	30	227788	P	30	295865	-3	0.00763
319	30	238100	F	30	238163	-3	0.00763
320	30	264125	F	30	437484	-3	0.00763
321	30	279085	F	30	355597	-3	0.00763
322	30	287449	F	30	305366	-3	0.00763
323	30	305366	F	30	307241	-3	0.00763
324	30	307204	F	30	386630	-3	0.00763
325	30	323788	F	30	323798	-3	0.00763
326	30	328978	P	30	527108	-3	0.00763
327	30	355775	F	30	502259	-3	0.00763
328	30	373444	C	30	373445	-3	0.00763
329	30	406277	P	30	425661	-3	0.00763
330	30	407640	F	30	432018	-3	0.00763
331	30	438641	F	30	475970	-3	0.00763
332	30	482898	F	30	534291	-3	0.00763
333	30	484243	F	30	511287	-3	0.00763

## Sheet: Table S7
Table S7 The codon usage data for PCGs
amino acid	Codon	Codon frequency	amino acid	Codon	Codon frequency
Ala	GCU	1.57	Ile	AUU	1.28
Ala	GCA	0.99	Ile	AUC	0.88
Ala	GCC	0.94	Ile	AUA	0.84
Ala	GCG	0.5	Leu	UUA	1.48
Arg	AGA	1.48	Leu	CUU	1.26
Arg	CGA	1.33	Leu	UUG	1.18
Arg	CGU	1.19	Leu	CUA	0.91
Arg	AGG	0.78	Leu	CUG	0.61
Arg	CGG	0.65	Leu	CUC	0.57
Arg	CGC	0.58	Lys	AAA	1.21
Asn	AAU	1.34	Lys	AAG	0.79
Asn	AAC	0.66	Met	AUG	1
Cys	UGU	1.19	Phe	UUU	1.12
Cys	UGC	0.81	Phe	UUC	0.88
End	UAA	1.5	Pro	CCU	1.5
End	UGA	1.03	Pro	CCA	1.1
End	UAG	0.47	Pro	CCC	0.8
Glu	GAA	1.38	Pro	CCG	0.61
Glu	GAG	0.62	Ser	UCU	1.4
Gly	GGA	1.46	Ser	UCA	1.11
Gly	GGU	1.29	Ser	AGU	1.11
Gly	GGG	0.71	Ser	UCC	0.91
Gly	GGC	0.54	Ser	UCG	0.81
His	CAU	1.51	Ser	AGC	0.66
His	CAC	0.49	Thr	ACU	1.36
Trp	UGG	1	Thr	ACC	1.02
Tyr	UAU	1.5	Thr	ACA	1.01
Tyr	UAC	0.5	Thr	ACG	0.61
Val	GUA	1.17	Val	GUG	0.9
Val	GUU	1.17	Val	GUC	0.76

## Sheet: Table S8
Table S8 The homologous DNA fragment in the A. odorata mitochondrial genome.
Number	% Identity	Alignment Length	Mismatches	Gap Openings	Alignment start (chloroplast genome)	Alignment end (chloroplast genome)	Alignment start (mitochondrial genome)	Alignment end (mitochondrial genome)	E-value	Bit Score	MTPT annotation	MTPT annotation
MTPT1	100	29	0	0	70496	70524	35380	35408	2.99e-06	54.7	Partial (petG)	Partial (petG)
MTPT2	100	36	0	0	121986	122021	472187	472222	3.84e-10	67.6	Partial (ndhD)	Partial (ndhD)
MTPT3	97.468	79	1	1	113600	113677	509874	509796	3.74e-30	134	Complete (trnN-GUU)	Complete (trnN-GUU)
	97.468	79	1	1	135178	135255	509796	509874	3.74e-30	134	Complete (trnN-GUU)	Complete (trnN-GUU)
MTPT4	96.203	79	3	0	1	79	525944	525866	4.83e-29	130	Complete (trnH-GUG)	Complete (trnH-GUG)
MTPT5	93.671	79	5	0	55902	55980	247567	247489	1.05e-25	119	Complete (trnM-CAU)	Complete (trnM-CAU)
MTPT6	93.243	148	5	2	37380	37526	155226	155369	4.66e-54	213	Partial (psbC)	Partial (psbC)
MTPT7	88.618	123	14	0	15008	15130	103960	104082	3.71e-35	150	Partial (atpH)	Partial (atpH)
MTPT8	88.618	123	14	0	15008	15130	388799	388921	3.71e-35	150	Partial (atpH)	Partial (atpH)
MTPT9	88.189	127	13	2	32608	32732	257658	257532	3.71e-35	150	Complete (trnD-GUC)	Complete (trnD-GUC)
MTPT10	81.818	396	39	13	70653	71046	149477	149113	9.68e-81	302	Complete (trnW-CCA，trnP-UGG)	Complete (trnW-CCA，trnP-UGG)
MTPT11	81.609	87	4	5	90590	90664	361551	361465	1.79e-08	62.1	Complete (trnI-CAU)	Complete (trnI-CAU)
	81.609	87	4	5	158191	158265	361465	361551	1.79e-08	62.1	Complete (trnI-CAU)	Complete (trnI-CAU)
MTPT12	81.551	1122	120	44	67890	68949	151265	150169	0	845	Complete (psbJ，psbL，psbF，psbE)	Complete (psbJ，psbL，psbF，psbE)

## Sheet: Table S9
Table S9 The predicted C to U RNA editing sites in mitochondrial PCGs of A. odorata.
Region	Position	Amino position	Codon change	Amino change	Reference	Coverage-q30	MeanQ	BaseCount[A,C,G,T]	AllSubs	Frequency
atp1	1410	470	GUC→GUU	Val→Val	C	9481	37	[0, 6594, 0, 2887]	CT	0.3
atp6	270	90	CUC→CUU	Leu→Leu	C	22435	37	[3, 4387, 0, 18045]	CT CA	0.8
atp9	20	7	UCA→UUA	Ser→Leu	C	37053	37	[4, 254, 1, 36794]	CT CA CG	0.99
atp9	50	17	UCA→UUA	Ser→Leu	C	39680	37	[1, 778, 3, 38898]	CT CG CA	0.98
atp9	134	45	UCA→UUA	Ser→Leu	C	35224	37	[3, 208, 0, 35013]	CT CA	0.99
atp9	182	61	UCG→UUG	Ser→Leu	C	38019	37	[1, 216, 0, 37802]	CT CA	0.99
atp9	191	64	CCA→CUA	Pro→Leu	C	36597	37	[678, 326, 23, 35570]	CT CA CG	0.99
atp9	212	71	UCA→UUA	Ser→Leu	C	37476	37	[1, 356, 1, 37118]	CT CG CA	0.99
atp9	215	72	UCC→UUC	Ser→Phe	C	35822	37	[0, 319, 1, 35502]	CT CG	0.99
atp9	223	75	CGA→UGA	Arg→End	C	35179	37	[1, 221, 0, 34957]	CT CA	0.99
ccmB	28	10	CAU→UAU	His→Tyr	C	2633	37	[0, 246, 0, 2387]	CT	0.91
ccmB	43	15	CCC→UCC	Pro→Ser	C	2406	37	[0, 311, 0, 2095]	CT	0.87
ccmB	70	24	CCA→UUA	Pro→Leu	C	2663	37	[0, 1156, 0, 1507]	CT	0.57
ccmB	71	24	CCA→UUA	Pro→Leu	C	2720	37	[0, 214, 0, 2506]	CT	0.92
ccmB	80	27	UCG→UUG	Ser→Leu	C	2784	37	[0, 225, 0, 2559]	CT	0.92
ccmB	87	29	AUC→AUU	Ile→Ile	C	2936	37	[1, 1888, 0, 1047]	CT CA	0.36
ccmB	128	43	UCA→UUA	Ser→Leu	C	3369	37	[0, 178, 0, 3191]	CT	0.95
ccmB	137	46	UCC→UUU	Ser→Phe	C	3464	37	[0, 247, 0, 3217]	CT	0.93
ccmB	138	46	UCC→UUU	Ser→Phe	C	3165	37	[0, 2782, 0, 383]	CT	0.12
ccmB	148	50	CCG→UUG	Pro→Leu	C	3137	37	[0, 283, 0, 2854]	CT	0.91
ccmB	149	50	CCG→UUG	Pro→Leu	C	3258	37	[0, 308, 0, 2950]	CT	0.91
ccmB	154	52	CGG→UGG	Arg→Trp	C	3348	37	[0, 323, 0, 3025]	CT	0.9
ccmB	160	54	CCU→UCU	Pro→Ser	C	3379	37	[0, 419, 0, 2960]	CT	0.88
ccmB	164	55	CCG→CUG	Pro→Leu	C	3242	37	[0, 330, 0, 2912]	CT	0.9
ccmB	172	58	CCU→UCU	Pro→Ser	C	3487	37	[0, 626, 0, 2861]	CT	0.82
ccmB	179	60	CCU→CUU	Pro→Leu	C	3157	37	[0, 547, 0, 2610]	CT	0.83
ccmB	181	61	CCC→UCU	Pro→Ser	C	3311	37	[0, 705, 0, 2606]	CT	0.79
ccmB	183	61	CCC→UCU	Pro→Ser	C	3195	37	[0, 2453, 0, 742]	CT	0.23
ccmB	193	65	CCU→UUU	Pro→Phe	C	3270	37	[0, 745, 0, 2525]	CT	0.77
ccmB	194	65	CCU→UUU	Pro→Phe	C	3277	37	[0, 830, 0, 2447]	CT	0.75
ccmB	286	96	CGG→UGG	Arg→Trp	C	4063	37	[0, 219, 0, 3844]	CT	0.95
ccmB	313	105	CGU→UGU	Arg→Cys	C	4273	37	[0, 306, 0, 3967]	CT	0.93
ccmB	337	113	CUG→UUG	Leu→Leu	C	4787	37	[0, 3273, 0, 1514]	CT	0.32
ccmB	357	119	UCC→UCU	Ser→Ser	C	5581	37	[0, 4767, 0, 814]	CT	0.15
ccmB	367	123	CGG→UGG	Arg→Trp	C	5965	37	[0, 599, 0, 5366]	CT	0.9
ccmB	379	127	CCA→UUA	Pro→Leu	C	6203	37	[0, 701, 0, 5502]	CT	0.89
ccmB	380	127	CCA→UUA	Pro→Leu	C	6312	37	[0, 541, 0, 5771]	CT	0.91
ccmB	424	142	CCU→UCU	Pro→Ser	C	5578	37	[0, 450, 0, 5128]	CT	0.92
ccmB	428	143	UCG→UUG	Ser→Leu	C	5540	37	[0, 190, 0, 5350]	CT	0.97
ccmB	467	156	UCG→UUG	Ser→Leu	C	4990	37	[2, 433, 1, 4554]	CT CA CG	0.91
ccmB	475	159	CCA→UUA	Pro→Leu	C	4677	37	[0, 198, 0, 4479]	CT	0.96
ccmB	476	159	CCA→UUA	Pro→Leu	C	4681	37	[0, 252, 0, 4429]	CT	0.95
ccmB	485	162	UCA→UUA	Ser→Leu	C	4512	37	[0, 422, 0, 4090]	CT	0.91
ccmB	502	168	CCA→UUA	Pro→Leu	C	4666	37	[64, 3577, 7, 1018]	CT CA CG	0.22
ccmB	503	168	CCA→UUA	Pro→Leu	C	4122	37	[53, 446, 18, 3605]	CT CA CG	0.89
ccmB	512	171	UCU→UUU	Ser→Phe	C	3136	37	[0, 204, 2, 2930]	CT CG	0.93
ccmB	514	172	CGU→UGU	Arg→Cys	C	3231	37	[0, 124, 0, 3107]	CT	0.96
ccmB	551	184	UCA→UUA	Ser→Leu	C	3496	37	[0, 276, 1, 3219]	CT CG	0.92
ccmB	554	185	UCG→UUG	Ser→Leu	C	3860	37	[0, 319, 0, 3541]	CT	0.92
ccmB	566	189	UCC→UUC	Ser→Phe	C	3901	37	[0, 218, 0, 3683]	CT	0.94
ccmB	569	190	UCU→UUU	Ser→Phe	C	3443	37	[0, 313, 0, 3130]	CT	0.91
ccmB	572	191	CCG→CUG	Pro→Leu	C	3685	37	[1, 738, 0, 2946]	CT CA	0.8
ccmB	576	192	UUC→UUU	Phe→Phe	C	3769	37	[0, 3182, 0, 587]	CT	0.16
ccmB	581	194	UCU→UUU	Ser→Phe	C	3768	37	[0, 3408, 0, 360]	CT	0.1
ccmB	596	199	UCG→UUG	Ser→Leu	C	3651	37	[0, 163, 0, 3488]	CT	0.96
ccmC	5	2	UCA→UUA	Ser→Leu	C	2101	37	[0, 248, 0, 1853]	CT	0.88
ccmC	76	26	CGG→UGG	Arg→Trp	C	2422	37	[0, 107, 0, 2315]	CT	0.96
ccmC	84	28	UUC→UUU	Phe→Phe	C	2366	37	[0, 2133, 0, 233]	CT	0.1
ccmC	103	35	CAU→UAU	His→Tyr	C	2518	37	[0, 266, 0, 2252]	CT	0.89
ccmC	115	39	CGG→UGG	Arg→Trp	C	2707	37	[0, 212, 0, 2495]	CT	0.92
ccmC	179	60	GCG→GUG	Ala→Val	C	3214	37	[2, 348, 1, 2863]	CT CA CG	0.89
ccmC	184	62	CGG→UGG	Arg→Trp	C	3338	37	[5, 116, 0, 3217]	CT CA	0.97
ccmC	331	111	CGG→UGG	Arg→Trp	C	3596	37	[2, 444, 1, 3149]	CT CA CG	0.88
ccmC	395	132	UCG→UUG	Ser→Leu	C	3647	37	[0, 128, 0, 3519]	CT	0.96
ccmC	399	133	UUC→UUU	Phe→Phe	C	3609	37	[0, 161, 0, 3448]	CT	0.96
ccmC	400	134	CUU→UUU	Leu→Phe	C	3568	37	[0, 408, 0, 3160]	CT	0.89
ccmC	421	141	CGU→UGU	Arg→Cys	C	3651	37	[1, 134, 0, 3516]	CT CA	0.96
ccmC	436	146	CCU→UCU	Pro→Ser	C	3887	37	[0, 212, 0, 3675]	CT	0.95
ccmC	446	149	CCG→CUG	Pro→Leu	C	3524	37	[5, 129, 4, 3386]	CT CA CG	0.96
ccmC	458	153	UCA→UUA	Ser→Leu	C	3702	37	[0, 625, 0, 3077]	CT	0.83
ccmC	463	155	CGU→UGU	Arg→Cys	C	3739	37	[0, 195, 0, 3544]	CT	0.95
ccmC	467	156	GCU→GUU	Ala→Val	C	3745	37	[0, 655, 0, 3090]	CT	0.83
ccmC	473	158	CCG→CUG	Pro→Leu	C	3915	37	[3, 403, 11, 3498]	CT CG CA	0.9
ccmC	497	166	UCU→UUU	Ser→Phe	C	4065	37	[0, 108, 0, 3957]	CT	0.97
ccmC	521	174	UCG→UUG	Ser→Leu	C	3813	37	[1, 276, 0, 3536]	CT CA	0.93
ccmC	548	183	UCU→UUU	Ser→Phe	C	2865	37	[1, 354, 5, 2505]	CT CG CA	0.88
ccmC	568	190	CCU→UCU	Pro→Ser	C	3211	37	[0, 266, 0, 2945]	CT	0.92
ccmC	575	192	CCC→CUC	Pro→Leu	C	3352	37	[1, 168, 2, 3181]	CT CG CA	0.95
ccmC	605	202	UCC→UUC	Ser→Phe	C	3123	37	[0, 360, 0, 2763]	CT	0.88
ccmC	608	203	CCC→CUU	Pro→Leu	C	2951	37	[1, 96, 0, 2854]	CT CA	0.97
ccmC	609	203	CCC→CUU	Pro→Leu	C	2971	37	[0, 2336, 0, 635]	CT	0.21
ccmC	612	204	UUC→UUU	Phe→Phe	C	2989	37	[0, 1237, 0, 1752]	CT	0.59
ccmC	619	207	CGU→UGU	Arg→Cys	C	2756	37	[6, 145, 0, 2605]	CT CA	0.95
ccmC	624	208	AUC→AUU	Ile→Ile	C	2602	37	[0, 2104, 0, 498]	CT	0.19
ccmC	650	217	CCU→CUU	Pro→Leu	C	1990	37	[0, 309, 0, 1681]	CT	0.84
ccmC	656	219	CCA→CUA	Pro→Leu	C	1913	37	[0, 101, 0, 1812]	CT	0.95
ccmC	673	225	CCU→UCU	Pro→Ser	C	1744	37	[0, 225, 0, 1519]	CT	0.87
ccmFC	50	17	CCU→CUU	Pro→Leu	C	1134	37	[0, 88, 0, 1046]	CT	0.92
ccmFC	52	18	CGU→UGU	Arg→Cys	C	1212	37	[0, 93, 0, 1119]	CT	0.92
ccmFC	103	35	CCC→UCC	Pro→Ser	C	1464	37	[0, 94, 0, 1370]	CT	0.94
ccmFC	146	49	CCU→CUU	Pro→Leu	C	1297	37	[0, 25, 0, 1272]	CT	0.98
ccmFC	151	51	CCU→UCU	Pro→Ser	C	1283	37	[0, 87, 0, 1196]	CT	0.93
ccmFC	160	54	CCU→UCU	Pro→Ser	C	1307	37	[0, 86, 0, 1221]	CT	0.93
ccmFC	175	59	CUA→UUA	Leu→Leu	C	1226	37	[0, 1022, 0, 204]	CT	0.17
ccmFC	310	104	CGU→UGU	Arg→Cys	C	1879	37	[0, 370, 0, 1509]	CT	0.8
ccmFC	321	107	CCC→CCU	Pro→Pro	C	1885	37	[0, 549, 0, 1336]	CT	0.71
ccmFC	334	112	CUU→UUU	Leu→Phe	C	1983	37	[0, 172, 0, 1811]	CT	0.91
ccmFC	391	131	CGU→UGU	Arg→Cys	C	1987	37	[0, 102, 0, 1885]	CT	0.95
ccmFC	406	136	CGU→UGU	Arg→Cys	C	2044	37	[0, 61, 0, 1983]	CT	0.97
ccmFC	487	163	CGG→UGG	Arg→Trp	C	2359	37	[0, 2094, 0, 265]	CT	0.11
ccmFC	715	239	CCA→UCA	Pro→Ser	C	2065	37	[0, 461, 0, 1604]	CT	0.78
ccmFC	1159	387	CUA→UUA	Leu→Leu	C	2262	37	[0, 1044, 0, 1218]	CT	0.54
ccmFC	1169	390	UCG→UUG	Ser→Leu	C	2432	37	[0, 703, 0, 1729]	CT	0.71
ccmFC	1243	415	CGG→UGG	Arg→Trp	C	2011	37	[0, 56, 0, 1955]	CT	0.97
ccmFC	1268	423	UCG→UUG	Ser→Leu	C	1815	37	[0, 164, 0, 1651]	CT	0.91
ccmFC	1277	426	UCG→UUG	Ser→Leu	C	1643	37	[0, 84, 0, 1559]	CT	0.95
ccmFC	1315	439	CGU→UGU	Arg→Cys	C	1500	37	[1, 1346, 0, 153]	CT CA	0.1
ccmFC	1324	442	CGA→UGA	Arg→End	C	1295	37	[0, 123, 0, 1172]	CT	0.91
ccmFN	38	13	CCG→CUG	Pro→Leu	C	1951	37	[0, 225, 0, 1726]	CT	0.88
ccmFN	98	33	CCU→CUU	Pro→Leu	C	2792	37	[0, 596, 0, 2196]	CT	0.79
ccmFN	137	46	UCG→UUG	Ser→Leu	C	2383	37	[0, 320, 0, 2063]	CT	0.87
ccmFN	142	48	CGU→UGU	Arg→Cys	C	2375	37	[0, 419, 0, 1956]	CT	0.82
ccmFN	151	51	CCU→UCU	Pro→Ser	C	2479	37	[0, 354, 0, 2125]	CT	0.86
ccmFN	248	83	UCA→UUA	Ser→Leu	C	2964	37	[0, 390, 0, 2574]	CT	0.87
ccmFN	256	86	CGG→UGG	Arg→Trp	C	3157	37	[0, 330, 0, 2827]	CT	0.9
ccmFN	263	88	CCA→CUA	Pro→Leu	C	3136	37	[1, 507, 0, 2628]	CT CA	0.84
ccmFN	283	95	CUU→UUU	Leu→Phe	C	3550	37	[0, 915, 0, 2635]	CT	0.74
ccmFN	365	122	UCG→UUG	Ser→Leu	C	3578	37	[0, 554, 0, 3024]	CT	0.85
ccmFN	369	123	AAC→AAU	Asn→Asn	C	3431	37	[0, 2358, 0, 1073]	CT	0.31
ccmFN	372	124	UUC→UUU	Phe→Phe	C	3367	37	[0, 2001, 0, 1366]	CT	0.41
ccmFN	435	145	UAC→UAU	Tyr→Tyr	C	2841	37	[0, 2458, 0, 383]	CT	0.13
ccmFN	556	186	CCU→UCU	Pro→Ser	C	2800	37	[1, 1527, 0, 1272]	CT CA	0.45
ccmFN	619	207	CUG→UUG	Leu→Leu	C	2868	37	[0, 2557, 0, 311]	CT	0.11
ccmFN	704	235	CCU→CUU	Pro→Leu	C	2648	37	[0, 485, 0, 2163]	CT	0.82
ccmFN	713	238	UCA→UUA	Ser→Leu	C	2626	37	[0, 700, 0, 1926]	CT	0.73
ccmFN	723	241	UCC→UCU	Ser→Ser	C	2704	37	[0, 1690, 0, 1014]	CT	0.38
ccmFN	751	251	CGU→UGU	Arg→Cys	C	2791	37	[0, 344, 0, 2447]	CT	0.88
ccmFN	773	258	UCA→UUA	Ser→Leu	C	2550	37	[0, 276, 0, 2274]	CT	0.89
ccmFN	785	262	CCA→CUA	Pro→Leu	C	2396	37	[0, 336, 0, 2060]	CT	0.86
ccmFN	800	267	UCA→UUA	Ser→Leu	C	2378	37	[0, 272, 0, 2106]	CT	0.89
ccmFN	949	317	CGC→UGC	Arg→Cys	C	2284	37	[0, 340, 0, 1944]	CT	0.85
ccmFN	1295	432	CCA→CUA	Pro→Leu	C	2397	37	[0, 305, 0, 2092]	CT	0.87
ccmFN	1327	443	CGG→UGG	Arg→Trp	C	2300	37	[3, 253, 0, 2044]	CT CA	0.89
ccmFN	1345	449	CGG→UGG	Arg→Trp	C	2448	37	[0, 230, 1, 2217]	CT CG	0.91
ccmFN	1378	460	CGG→UGG	Arg→Trp	C	2486	37	[0, 184, 0, 2302]	CT	0.93
ccmFN	1396	466	CGU→UGU	Arg→Cys	C	2835	37	[0, 349, 0, 2486]	CT	0.88
ccmFN	1439	480	UCG→UUG	Ser→Leu	C	2756	37	[1, 921, 0, 1834]	CT CA	0.67
ccmFN	1459	487	CUU→UUU	Leu→Phe	C	2877	37	[0, 292, 0, 2585]	CT	0.9
ccmFN	1463	488	CCA→CUA	Pro→Leu	C	2925	37	[0, 89, 0, 2836]	CT	0.97
ccmFN	1475	492	UCA→UUA	Ser→Leu	C	3308	37	[0, 356, 0, 2952]	CT	0.89
ccmFN	1510	504	CCC→UCC	Pro→Ser	C	3391	37	[0, 139, 0, 3252]	CT	0.96
ccmFN	1566	522	UUC→UUU	Phe→Phe	C	3492	37	[0, 3075, 0, 417]	CT	0.12
cob	118	40	CCG→UCG	Pro→Ser	C	7287	37	[0, 107, 0, 7180]	CT	0.99
cob	180	60	UAC→UAU	Tyr→Tyr	C	7674	37	[1, 4212, 1, 3460]	CT CA CG	0.45
cob	286	96	CUC→UUC	Leu→Phe	C	10064	37	[0, 126, 1, 9937]	CT CG	0.99
cob	298	100	CAC→UAC	His→Tyr	C	10129	37	[7, 149, 0, 9973]	CT CA	0.99
cob	325	109	CAU→UAU	His→Tyr	C	9391	37	[0, 301, 0, 9090]	CT	0.97
cob	407	136	ACA→AUA	Thr→Ile	C	8511	37	[1, 105, 0, 8405]	CT CA	0.99
cob	568	190	CAU→UAU	His→Tyr	C	9243	37	[1, 40, 4, 9198]	CT CG CA	1
cob	808	270	CCC→UCC	Pro→Ser	C	9154	37	[0, 74, 0, 9080]	CT	0.99
cob	853	285	CAU→UAU	His→Tyr	C	10640	37	[10, 94, 1, 10535]	CT CA CG	0.99
cob	908	303	CCA→CUA	Pro→Leu	C	10336	37	[7, 62, 7, 10260]	CT CA CG	0.99
cob	982	328	CAC→UAC	His→Tyr	C	10155	37	[1, 4932, 0, 5222]	CT CA	0.51
cob	1084	362	CCU→UCU	Pro→Ser	C	11999	37	[0, 188, 0, 11811]	CT	0.98
cob	1124	375	CCG→CUG	Pro→Leu	C	10026	37	[2, 80, 2, 9942]	CT CA CG	0.99
cob	1160	387	ACG→AUG	Thr→Met	C	7255	37	[0, 5302, 0, 1953]	CT	0.27
cox1	11	4	CCG→CUG	Pro→Leu	C	5390	37	[0, 507, 0, 4883]	CT	0.91
cox1	242	81	UCU→UUU	Ser→Phe	C	12250	37	[1, 231, 3, 12015]	CT CG CA	0.98
cox1	254	85	UCU→UUU	Ser→Phe	C	13108	37	[2, 253, 1, 12852]	CT CA CG	0.98
cox1	443	148	UCA→UUA	Ser→Leu	C	14164	37	[0, 399, 1, 13764]	CT CG	0.97
cox1	452	151	UCU→UUU	Ser→Phe	C	14214	37	[2, 302, 0, 13910]	CT CA	0.98
cox1	515	172	UCC→UUC	Ser→Phe	C	19482	37	[0, 322, 0, 19160]	CT	0.98
cox1	551	184	UCA→UUA	Ser→Leu	C	17837	37	[2, 1679, 0, 16156]	CT CA	0.91
cox1	570	190	UCC→UCU	Ser→Ser	C	16674	37	[3, 13740, 0, 2931]	CT CA	0.18
cox1	668	223	UCU→UUU	Ser→Phe	C	16642	37	[1, 90, 0, 16551]	CT CA	0.99
cox1	761	254	UCC→UUC	Ser→Phe	C	16383	37	[1, 197, 0, 16185]	CT CA	0.99
cox1	1079	360	CCG→CUG	Pro→Leu	C	13399	37	[3, 631, 0, 12765]	CT CA	0.95
cox1	1186	396	CAC→UAC	His→Tyr	C	12639	37	[1, 358, 0, 12280]	CT CA	0.97
cox1	1402	468	CGU→UGU	Arg→Cys	C	17512	37	[1, 281, 0, 17230]	CT CA	0.98
cox1	1405	469	CGU→UGU	Arg→Cys	C	17456	37	[1, 491, 0, 16964]	CT CA	0.97
cox1	1433	478	UCA→UUA	Ser→Leu	C	16770	37	[4, 735, 2, 16029]	CT CA CG	0.96
cox1	1489	497	CCA→UCA	Pro→Ser	C	20191	37	[0, 3449, 0, 16742]	CT	0.83
cox1	1499	500	CCG→CUG	Pro→Leu	C	20203	37	[8, 626, 6, 19563]	CT CA CG	0.97
cox2	163	55	CGG→UGG	Arg→Trp	C	9501	37	[0, 179, 1, 9321]	CT CG	0.98
cox2	632	211	UCG→UUG	Ser→Leu	C	10163	37	[1, 56, 0, 10106]	CT CA	0.99
cox2	721	241	CCU→UCU	Pro→Ser	C	9184	37	[0, 130, 0, 9054]	CT	0.99
cox2	742	248	CGG→UGG	Arg→Trp	C	8537	37	[1, 50, 0, 8486]	CT CA	0.99
matR	32	11	UCC→UUC	Ser→Phe	C	1334	37	[0, 1026, 0, 308]	CT	0.23
matR	326	109	CCA→CUA	Pro→Leu	C	481	37	[1, 70, 0, 410]	CT CA	0.85
matR	413	138	UCG→UUG	Ser→Leu	C	494	37	[0, 95, 0, 399]	CT	0.81
matR	929	310	UCA→UUA	Ser→Leu	C	722	37	[0, 118, 0, 604]	CT	0.84
matR	1551	517	CCC→CCU	Pro→Pro	C	1199	37	[0, 797, 0, 402]	CT	0.34
matR	1685	562	UCC→UUC	Ser→Phe	C	1603	37	[0, 139, 0, 1464]	CT	0.91
matR	1706	569	CCU→CUU	Pro→Leu	C	1603	37	[0, 149, 2, 1452]	CT CG	0.91
matR	1726	576	CGC→UGC	Arg→Cys	C	1595	37	[0, 140, 0, 1455]	CT	0.91
matR	1740	580	UAC→UAU	Tyr→Tyr	C	1575	37	[0, 348, 0, 1227]	CT	0.78
matR	1762	588	CAC→UAC	His→Tyr	C	1478	37	[2, 103, 0, 1373]	CT CA	0.93
matR	1832	611	CCA→CUA	Pro→Leu	C	1791	37	[0, 99, 0, 1692]	CT	0.94
matR	1850	617	UCA→UUA	Ser→Leu	C	1634	37	[0, 101, 0, 1533]	CT	0.94
matR	1881	627	ACC→ACU	Thr→Thr	C	1687	37	[0, 1335, 0, 352]	CT	0.21
mttB	16	6	CAU→UAU	His→Tyr	C	2034	37	[0, 258, 0, 1776]	CT	0.87
mttB	25	9	CCG→UUG	Pro→Leu	C	1877	37	[0, 1385, 0, 492]	CT	0.26
mttB	26	9	CCG→UUG	Pro→Leu	C	1895	37	[0, 367, 1, 1527]	CT CG	0.81
mttB	37	13	CUA→UUA	Leu→Leu	C	1923	37	[0, 1309, 1, 613]	CT CG	0.32
mttB	64	22	CGG→UGG	Arg→Trp	C	2229	37	[0, 268, 0, 1961]	CT	0.88
mttB	75	25	AUC→AUU	Ile→Ile	C	2418	37	[0, 1742, 0, 676]	CT	0.28
mttB	100	34	CGU→UGU	Arg→Cys	C	2941	37	[1, 892, 0, 2048]	CT CA	0.7
mttB	105	35	UAC→UAU	Tyr→Tyr	C	2957	37	[0, 2486, 0, 471]	CT	0.16
mttB	112	38	CCG→UCG	Pro→Ser	C	2963	37	[0, 1182, 0, 1781]	CT	0.6
mttB	128	43	UCU→UUU	Ser→Phe	C	2831	37	[0, 1233, 0, 1598]	CT	0.56
mttB	131	44	CCA→CUA	Pro→Leu	C	2789	37	[0, 968, 0, 1821]	CT	0.65
mttB	178	60	CGU→UGU	Arg→Cys	C	2921	37	[0, 264, 0, 2657]	CT	0.91
mttB	188	63	UCA→UUA	Ser→Leu	C	2802	37	[0, 627, 0, 2175]	CT	0.78
mttB	200	67	CCC→CUC	Pro→Leu	C	2508	37	[0, 387, 0, 2121]	CT	0.85
mttB	202	68	CCG→UCG	Pro→Ser	C	2518	37	[2, 499, 0, 2017]	CT CA	0.8
mttB	327	109	UUC→UUU	Phe→Phe	C	2613	37	[1, 2282, 0, 330]	CT CA	0.13
mttB	328	110	CUC→UUC	Leu→Phe	C	2477	37	[0, 512, 2, 1963]	CT CG	0.79
mttB	331	111	CAU→UAU	His→Tyr	C	2771	37	[0, 482, 0, 2289]	CT	0.83
mttB	344	115	UCU→UUU	Ser→Phe	C	2543	37	[0, 764, 0, 1779]	CT	0.7
mttB	346	116	CGC→UGC	Arg→Cys	C	2709	37	[0, 248, 0, 2461]	CT	0.91
mttB	353	118	UCC→UUC	Ser→Phe	C	2598	37	[1, 1228, 0, 1369]	CT CA	0.53
mttB	357	119	UUC→UUU	Phe→Phe	C	2596	37	[0, 1300, 0, 1296]	CT	0.5
mttB	373	125	CCU→UUU	Pro→Phe	C	2105	37	[0, 833, 0, 1272]	CT	0.6
mttB	374	125	CCU→UUU	Pro→Phe	C	2192	37	[0, 480, 0, 1712]	CT	0.78
mttB	376	126	CCC→UCC	Pro→Ser	C	2262	37	[0, 373, 0, 1889]	CT	0.84
mttB	379	127	CGG→UGG	Arg→Trp	C	2293	37	[1, 1044, 0, 1248]	CT CA	0.54
mttB	407	136	CCA→CUA	Pro→Leu	C	2576	37	[0, 439, 0, 2137]	CT	0.83
mttB	437	146	UCG→UUG	Ser→Leu	C	2961	37	[0, 763, 0, 2198]	CT	0.74
mttB	497	166	UCG→UUG	Ser→Leu	C	3292	37	[0, 627, 0, 2665]	CT	0.81
mttB	505	169	CCA→UCA	Pro→Ser	C	3558	37	[0, 372, 0, 3186]	CT	0.9
mttB	541	181	CGU→UGU	Arg→Cys	C	3528	37	[1, 433, 0, 3094]	CT CA	0.88
mttB	548	183	CCA→CUA	Pro→Leu	C	3590	37	[2, 2297, 0, 1291]	CT CA	0.36
mttB	554	185	CCA→CUA	Pro→Leu	C	3637	37	[0, 897, 2, 2738]	CT CG	0.75
mttB	578	193	UCC→UUC	Ser→Phe	C	3130	37	[0, 809, 0, 2321]	CT	0.74
mttB	610	204	CCG→UCG	Pro→Ser	C	3622	37	[1, 549, 0, 3072]	CT CA	0.85
mttB	616	206	CUC→UUC	Leu→Phe	C	3561	37	[0, 547, 0, 3014]	CT	0.85
mttB	620	207	ACA→AUA	Thr→Ile	C	3263	37	[1, 2675, 1, 586]	CT CA CG	0.18
mttB	660	220	AUC→AUU	Ile→Ile	C	3526	37	[1, 301, 0, 3224]	CT CA	0.91
mttB	667	223	CGU→UGU	Arg→Cys	C	3094	37	[3, 907, 0, 2184]	CT CA	0.71
mttB	672	224	UUC→UUU	Phe→Phe	C	2902	37	[1, 2406, 0, 495]	CT CA	0.17
mttB	713	238	UCG→UUG	Ser→Leu	C	3725	37	[0, 387, 0, 3338]	CT	0.9
nad1	2	1	ACG→AUG	Thr→Met	C	4314	37	[0, 2021, 0, 2293]	CT	0.53
nad1	40	14	CUA→UUA	Leu→Leu	C	4984	37	[0, 3716, 0, 1268]	CT	0.25
nad1	167	56	UCG→UUG	Ser→Leu	C	5697	37	[0, 351, 0, 5346]	CT	0.94
nad1	215	72	UCC→UUC	Ser→Phe	C	5631	37	[0, 376, 0, 5255]	CT	0.93
nad1	265	89	CGG→UGG	Arg→Trp	C	5791	37	[0, 575, 0, 5216]	CT	0.9
nad1	307	103	CCG→UUG	Pro→Leu	C	5743	37	[0, 782, 0, 4961]	CT	0.86
nad1	308	103	CCG→UUG	Pro→Leu	C	5791	37	[1, 528, 0, 5262]	CT CA	0.91
nad1	376	126	CGG→UGG	Arg→Trp	C	4591	37	[1, 217, 3, 4370]	CT CG CA	0.95
nad1	635	212	UCA→UUA	Ser→Leu	C	4144	37	[0, 42, 0, 4102]	CT	0.99
nad1	674	225	UCU→UUU	Ser→Phe	C	3947	37	[2, 49, 0, 3896]	CT CA	0.99
nad1	725	242	CCA→CUA	Pro→Leu	C	4917	37	[4, 110, 0, 4803]	CT CA	0.98
nad1	734	245	UCG→UUG	Ser→Leu	C	5107	37	[0, 176, 0, 4931]	CT	0.97
nad1	740	247	UCU→UUU	Ser→Phe	C	4780	37	[0, 137, 0, 4643]	CT	0.97
nad1	743	248	CCA→CUA	Pro→Leu	C	5144	37	[0, 100, 0, 5044]	CT	0.98
nad1	755	252	CCG→CUG	Pro→Leu	C	6377	37	[2, 265, 3, 6107]	CT CG CA	0.96
nad1	835	279	CUA→UUA	Leu→Leu	C	5152	37	[5, 4565, 0, 582]	CT CA	0.11
nad1	898	300	CGG→UGG	Arg→Trp	C	4341	37	[3, 126, 0, 4212]	CT CA	0.97
nad1	909	303	UUC→UUU	Phe→Phe	C	5490	37	[1, 3956, 0, 1533]	CT CA	0.28
nad1	928	310	CGG→UGG	Arg→Trp	C	4918	37	[2, 125, 1, 4790]	CT CA CG	0.97
nad1	936	312	GUC→GUU	Val→Val	C	4303	37	[0, 3494, 1, 808]	CT CG	0.19
nad1	937	313	CCC→UCC	Pro→Ser	C	4468	37	[1, 97, 0, 4370]	CT CA	0.98
nad2	223	75	CUU→UUU	Leu→Phe	C	4385	37	[2, 197, 0, 4186]	CT CA	0.96
nad2	252	84	UUC→UUU	Phe→Phe	C	4351	37	[1, 3294, 0, 1056]	CT CA	0.24
nad2	303	101	UUC→UUU	Phe→Phe	C	4176	37	[0, 482, 0, 3694]	CT	0.88
nad2	308	103	UCU→UUU	Ser→Phe	C	4105	37	[0, 197, 0, 3908]	CT	0.95
nad2	342	114	UUC→UUU	Phe→Phe	C	4005	37	[0, 3537, 1, 467]	CT CG	0.12
nad2	356	119	CCA→CUA	Pro→Leu	C	4272	37	[0, 143, 0, 4129]	CT	0.97
nad2	361	121	CCU→UCU	Pro→Ser	C	4241	37	[0, 103, 0, 4138]	CT	0.98
nad2	367	123	CGC→UGC	Arg→Cys	C	4325	37	[1, 142, 0, 4182]	CT CA	0.97
nad2	394	132	CAU→UAU	His→Tyr	C	4278	37	[11, 212, 2, 4053]	CT CA CG	0.95
nad2	401	134	UCA→UUA	Ser→Leu	C	4567	37	[0, 225, 0, 4342]	CT	0.95
nad2	428	143	CCU→CUU	Pro→Leu	C	4803	37	[1, 141, 4, 4657]	CT CG CA	0.97
nad2	453	151	AUC→AUU	Ile→Ile	C	4519	37	[0, 4008, 0, 511]	CT	0.11
nad2	497	166	UCG→UUG	Ser→Leu	C	4598	37	[6, 101, 0, 4491]	CT CA	0.98
nad2	523	175	CCC→UCU	Pro→Ser	C	4635	37	[0, 140, 0, 4495]	CT	0.97
nad2	525	175	CCC→UCU	Pro→Ser	C	4204	37	[0, 3045, 0, 1159]	CT	0.28
nad2	552	184	UCC→UCU	Ser→Ser	C	4389	37	[1, 3811, 0, 577]	CT CA	0.13
nad2	662	221	UCU→UUU	Ser→Phe	C	3448	37	[0, 176, 0, 3272]	CT	0.95
nad2	788	263	UCU→UUU	Ser→Phe	C	5377	37	[0, 223, 0, 5154]	CT	0.96
nad2	800	267	UCA→UUA	Ser→Leu	C	6075	37	[0, 188, 0, 5887]	CT	0.97
nad2	809	270	UCU→UUU	Ser→Phe	C	5849	37	[0, 222, 0, 5627]	CT	0.96
nad2	920	307	CCU→CUU	Pro→Leu	C	7045	37	[0, 477, 2, 6566]	CT CG	0.93
nad2	928	310	CAU→UAU	His→Tyr	C	7163	37	[3, 489, 0, 6671]	CT CA	0.93
nad2	958	320	CGU→UGU	Arg→Cys	C	8830	37	[0, 292, 0, 8538]	CT	0.97
nad2	962	321	ACU→AUU	Thr→Ile	C	8757	37	[0, 559, 0, 8198]	CT	0.94
nad2	1058	353	UCA→UUA	Ser→Leu	C	11467	37	[0, 1002, 0, 10465]	CT	0.91
nad2	1127	376	UCG→UUG	Ser→Leu	C	11903	37	[1, 573, 0, 11329]	CT CA	0.95
nad2	1200	400	UUC→UUU	Phe→Phe	C	12670	37	[2, 8586, 0, 4082]	CT CA	0.32
nad2	1246	416	CCA→UCA	Pro→Ser	C	13213	37	[1, 736, 0, 12476]	CT CA	0.94
nad2	1276	426	CGU→UGU	Arg→Cys	C	11288	37	[1, 471, 0, 10816]	CT CA	0.96
nad2	1298	433	GCG→GUG	Ala→Val	C	12319	37	[0, 93, 0, 12226]	CT	0.99
nad2	1400	467	UCA→UUA	Ser→Leu	C	11023	37	[0, 366, 0, 10657]	CT	0.97
nad2	1408	470	CUA→UUA	Leu→Leu	C	10059	37	[1, 7754, 0, 2304]	CT CA	0.23
nad2	1416	472	CCC→CCU	Pro→Pro	C	9707	37	[5, 4654, 2, 5046]	CT CA CG	0.52
nad2	1457	486	UCA→UUA	Ser→Leu	C	6804	37	[0, 358, 1, 6445]	CT CG	0.95
nad3	23	8	UCU→UUU	Ser→Phe	C	804	37	[0, 68, 0, 736]	CT	0.92
nad3	43	15	CUG→UUG	Leu→Leu	C	786	37	[0, 105, 0, 681]	CT	0.87
nad4	74	25	ACU→AUU	Thr→Ile	C	2778	37	[0, 1442, 0, 1336]	CT	0.48
nad4	385	129	CUA→UUA	Leu→Leu	C	2805	37	[0, 2518, 0, 287]	CT	0.1
nad4	1132	378	CCU→UCU	Pro→Ser	C	6561	37	[0, 199, 0, 6362]	CT	0.97
nad4	1405	469	CGG→UGG	Arg→Trp	C	5827	37	[0, 57, 2, 5768]	CT CG	0.99
nad4	1417	473	CAC→UAC	His→Tyr	C	5732	37	[0, 84, 0, 5648]	CT	0.99
nad4	1433	478	CCG→CUG	Pro→Leu	C	5634	37	[1, 113, 2, 5518]	CT CG CA	0.98
nad4L	2	1	ACG→AUG	Thr→Met	C	1255	37	[0, 119, 0, 1136]	CT	0.91
nad4L	21	7	UUC→UUU	Phe→Phe	C	1369	37	[0, 1185, 0, 184]	CT	0.13
nad4L	41	14	UCU→UUU	Ser→Phe	C	1607	37	[0, 110, 0, 1497]	CT	0.93
nad4L	86	29	CCA→CUA	Pro→Leu	C	2115	37	[0, 78, 0, 2037]	CT	0.96
nad4L	95	32	UCA→UUA	Ser→Leu	C	2226	37	[0, 158, 0, 2068]	CT	0.93
nad4L	110	37	UCA→UUA	Ser→Leu	C	2192	37	[0, 146, 0, 2046]	CT	0.93
nad4L	150	50	UCC→UCU	Ser→Ser	C	2545	37	[0, 2077, 0, 468]	CT	0.18
nad4L	179	60	UCA→UUA	Ser→Leu	C	2516	37	[0, 203, 0, 2313]	CT	0.92
nad4L	188	63	UCA→UUA	Ser→Leu	C	2567	37	[1, 358, 0, 2208]	CT CA	0.86
nad4L	197	66	CCA→CUA	Pro→Leu	C	2473	37	[0, 287, 1, 2185]	CT CG	0.88
nad5	155	52	CCG→CUG	Pro→Leu	C	1792	37	[0, 172, 0, 1620]	CT	0.9
nad5	1490	497	CCC→CUC	Pro→Leu	C	5832	37	[0, 97, 0, 5735]	CT	0.98
nad5	1494	498	UUC→UUU	Phe→Phe	C	5638	37	[1, 3104, 0, 2533]	CT CA	0.45
nad5	1550	517	ACC→AUU	Thr→Ile	C	6435	37	[0, 149, 0, 6286]	CT	0.98
nad5	1551	517	ACC→AUU	Thr→Ile	C	6532	37	[0, 5860, 0, 672]	CT	0.1
nad5	1568	523	CCG→CUG	Pro→Leu	C	6487	37	[0, 69, 0, 6418]	CT	0.99
nad5	1580	527	UCA→UUA	Ser→Leu	C	6415	37	[0, 246, 0, 6169]	CT	0.96
nad5	1589	530	UCU→UUU	Ser→Phe	C	6138	37	[0, 524, 0, 5614]	CT	0.91
nad5	1610	537	CCC→CUC	Pro→Leu	C	7821	37	[1, 822, 0, 6998]	CT CA	0.89
nad5	1895	632	UCA→UUA	Ser→Leu	C	13645	37	[1, 1735, 0, 11909]	CT CA	0.87
nad5	1916	639	UCU→UUU	Ser→Phe	C	11136	37	[0, 449, 0, 10687]	CT	0.96
nad5	1918	640	CGU→UGU	Arg→Cys	C	11110	37	[0, 178, 0, 10932]	CT	0.98
nad5	1958	653	UCG→UUG	Ser→Leu	C	7890	37	[1, 905, 0, 6984]	CT CA	0.89
nad6	95	32	CCA→CUA	Pro→Leu	C	4208	37	[1, 137, 0, 4070]	CT CA	0.97
nad6	138	46	CUC→CUU	Leu→Leu	C	4532	37	[1, 3925, 0, 606]	CT CA	0.13
nad6	161	54	CCA→CUA	Pro→Leu	C	4573	37	[0, 106, 0, 4467]	CT	0.98
nad6	306	102	UUC→UUU	Phe→Phe	C	6819	37	[2, 5597, 0, 1220]	CT CA	0.18
nad6	446	149	UCC→UUC	Ser→Phe	C	6474	37	[0, 61, 0, 6413]	CT	0.99
nad7	38	13	UCG→UUG	Ser→Leu	C	1476	37	[0, 70, 0, 1406]	CT	0.95
nad7	45	15	UUC→UUU	Phe→Phe	C	1499	37	[0, 1130, 0, 369]	CT	0.25
nad7	77	26	UCA→UUA	Ser→Leu	C	1466	37	[0, 45, 0, 1421]	CT	0.97
nad7	83	28	UCA→UUA	Ser→Leu	C	1384	37	[0, 109, 0, 1275]	CT	0.92
nad7	137	46	UCA→UUA	Ser→Leu	C	1833	37	[0, 65, 0, 1768]	CT	0.96
nad7	200	67	UCU→UUU	Ser→Phe	C	1715	37	[0, 64, 0, 1651]	CT	0.96
nad7	209	70	UCA→UUA	Ser→Leu	C	1556	37	[0, 12, 0, 1544]	CT	0.99
nad7	244	82	CAU→UAU	His→Tyr	C	3536	37	[5, 196, 0, 3335]	CT CA	0.94
nad7	251	84	UCA→UUA	Ser→Leu	C	3447	37	[0, 204, 0, 3243]	CT	0.94
nad7	316	106	CGU→UGU	Arg→Cys	C	3797	37	[0, 207, 0, 3590]	CT	0.95
nad7	335	112	UCA→UUA	Ser→Leu	C	4095	37	[0, 406, 0, 3689]	CT	0.9
nad7	344	115	UCA→UUA	Ser→Leu	C	4421	37	[1, 361, 0, 4059]	CT CA	0.92
nad7	383	128	UCA→UUA	Ser→Leu	C	4363	37	[0, 526, 0, 3837]	CT	0.88
nad7	404	135	UCU→UUU	Ser→Phe	C	4510	37	[0, 153, 0, 4357]	CT	0.97
nad7	533	178	UCC→UUC	Ser→Phe	C	5189	37	[0, 317, 0, 4872]	CT	0.94
nad7	578	193	UCA→UUA	Ser→Leu	C	5507	37	[0, 105, 0, 5402]	CT	0.98
nad7	679	227	CCA→UCA	Pro→Ser	C	5528	37	[3, 501, 0, 5024]	CT CA	0.91
nad7	698	233	UCG→UUG	Ser→Leu	C	5021	37	[4, 463, 0, 4554]	CT CA	0.91
nad7	724	242	CAU→UAU	His→Tyr	C	4680	37	[0, 125, 0, 4555]	CT	0.97
nad7	739	247	CCU→UUU	Pro→Phe	C	4285	37	[0, 220, 2, 4063]	CT CG	0.95
nad7	740	247	CCU→UUU	Pro→Phe	C	4384	37	[2, 156, 0, 4226]	CT CA	0.96
nad7	769	257	CGC→UGC	Arg→Cys	C	4454	37	[1, 247, 0, 4206]	CT CA	0.94
nad7	795	265	AUC→AUU	Ile→Ile	C	5110	37	[0, 100, 0, 5010]	CT	0.98
nad7	926	309	UCA→UUA	Ser→Leu	C	7625	37	[0, 1549, 0, 6076]	CT	0.8
nad7	944	315	CCU→CUU	Pro→Leu	C	7631	37	[3, 204, 2, 7422]	CT CA CG	0.97
nad7	963	321	UCC→UCU	Ser→Ser	C	7719	37	[0, 3841, 0, 3878]	CT	0.5
nad7	973	325	CCU→UCU	Pro→Ser	C	7598	37	[0, 400, 0, 7198]	CT	0.95
nad7	1050	350	CCC→CCU	Pro→Pro	C	6256	37	[7, 197, 5, 6047]	CT CA CG	0.97
nad7	1057	353	CGU→UGU	Arg→Cys	C	5870	37	[0, 453, 0, 5417]	CT	0.92
nad7	1079	360	UCU→UUU	Ser→Phe	C	7628	37	[10, 762, 0, 6856]	CT CA	0.9
nad7	1103	368	UCU→UUU	Ser→Phe	C	7095	37	[1, 301, 0, 6793]	CT CA	0.96
nad7	1124	375	CCA→CUA	Pro→Leu	C	6266	37	[8, 385, 6, 5867]	CT CA CG	0.94
nad7	1166	389	UCU→UUU	Ser→Phe	C	5328	37	[0, 126, 0, 5202]	CT	0.98
nad9	14	5	UCC→UUC	Ser→Phe	C	4851	37	[1, 388, 0, 4462]	CT CA	0.92
nad9	92	31	UCU→UUU	Ser→Phe	C	5140	37	[0, 188, 0, 4952]	CT	0.96
nad9	190	64	CAU→UAU	His→Tyr	C	6620	37	[0, 208, 0, 6412]	CT	0.97
nad9	298	100	CCG→UCG	Pro→Ser	C	7925	37	[1, 224, 0, 7700]	CT CA	0.97
nad9	328	110	CGG→UGG	Arg→Trp	C	6644	37	[14, 410, 4, 6216]	CT CA CG	0.94
nad9	398	133	UCA→UUA	Ser→Leu	C	6746	37	[2, 182, 0, 6562]	CT CA	0.97
nad9	439	147	CUU→UUU	Leu→Phe	C	4869	37	[2, 214, 3, 4650]	CT CG CA	0.96
rpl10	9	3	UUC→UUU	Phe→Phe	C	883	37	[0, 409, 0, 474]	CT	0.54
rpl10	101	34	UCG→UUG	Ser→Leu	C	1046	37	[0, 125, 0, 921]	CT	0.88
rpl10	133	45	CCA→UUA	Pro→Leu	C	1075	37	[1, 61, 0, 1013]	CT CA	0.94
rpl10	134	45	CCA→UUA	Pro→Leu	C	1354	37	[0, 418, 0, 936]	CT	0.69
rpl10	155	52	CCA→CUA	Pro→Leu	C	1393	37	[0, 52, 0, 1341]	CT	0.96
rpl10	239	80	UCG→UUG	Ser→Leu	C	1287	37	[0, 335, 0, 952]	CT	0.74
rpl10	314	105	UCA→UUA	Ser→Leu	C	892	37	[0, 62, 0, 830]	CT	0.93
rpl10	330	110	UAC→UAU	Tyr→Tyr	C	520	37	[0, 243, 0, 277]	CT	0.53
rpl10	397	133	CUU→UUU	Leu→Phe	C	650	37	[0, 411, 0, 239]	CT	0.37
rpl10	481	161	CCU→UCU	Pro→Ser	C	448	37	[0, 12, 0, 436]	CT	0.97
rpl16	37	13	CGU→UGU	Arg→Cys	C	2388	37	[0, 2109, 0, 279]	CT	0.12
rpl16	104	35	ACU→AUU	Thr→Ile	C	3184	37	[0, 43, 0, 3141]	CT	0.99
rpl16	164	55	ACA→AUA	Thr→Ile	C	4689	37	[0, 197, 0, 4492]	CT	0.96
rpl16	232	78	CUC→UUC	Leu→Phe	C	6080	37	[0, 560, 0, 5520]	CT	0.91
rpl16	321	107	UCC→UCU	Ser→Ser	C	7183	37	[1, 4208, 0, 2974]	CT CA	0.41
rpl16	401	134	CCA→CUA	Pro→Leu	C	6557	37	[0, 450, 0, 6107]	CT	0.93
rpl16	407	136	UCG→UUG	Ser→Leu	C	6680	37	[0, 132, 0, 6548]	CT	0.98
rpl2	215	72	CCA→CUA	Pro→Leu	C	782	37	[1, 109, 0, 672]	CT CA	0.86
rpl2	310	104	CCU→UCU	Pro→Ser	C	878	37	[0, 720, 0, 158]	CT	0.18
rpl2	932	311	CCA→CUA	Pro→Leu	C	1889	37	[0, 1537, 0, 352]	CT	0.19
rpl2	972	324	UCC→UCU	Ser→Ser	C	1482	37	[0, 1039, 0, 443]	CT	0.3
rpl5	213	71	UCG→UCU	Ser→Ser	C	8463	37	[0, 7550, 0, 913]	CT	0.11
rps1	23	8	UCA→UUA	Ser→Leu	C	2704	37	[0, 129, 0, 2575]	CT	0.95
rps1	51	17	UUC→UUU	Phe→Phe	C	2488	37	[0, 388, 0, 2100]	CT	0.84
rps1	209	70	UCC→UUC	Ser→Phe	C	4462	37	[0, 287, 0, 4175]	CT	0.94
rps1	482	161	UCA→UUA	Ser→Leu	C	4567	37	[0, 2304, 0, 2263]	CT	0.5
rps10	83	28	ACG→AUG	Thr→Met	C	7474	37	[2, 1357, 0, 6115]	CT CA	0.82
rps10	315	105	UUC→UUU	Phe→Phe	C	10174	37	[1, 8680, 0, 1493]	CT CA	0.15
rps10	319	107	CGG→UGG	Arg→Trp	C	10644	37	[0, 490, 1, 10153]	CT CG	0.95
rps10	368	123	UCU→UUU	Ser→Phe	C	7916	37	[1, 6367, 0, 1548]	CT CA	0.2
rps10	383	128	UCG→UUG	Ser→Leu	C	6663	37	[3, 785, 0, 5875]	CT CA	0.88
rps10	412	138	CGA→UGA	Arg→End	C	6182	37	[0, 449, 0, 5733]	CT	0.93
rps3	713	238	UCG→UUG	Ser→Leu	C	2243	37	[1, 261, 0, 1981]	CT CA	0.88
rps3	1317	439	ACC→ACU	Thr→Thr	C	3136	37	[0, 2619, 1, 516]	CT CG	0.16
rps3	1364	455	CCG→CUG	Pro→Leu	C	3944	37	[0, 36, 0, 3908]	CT	0.99
rps3	1588	530	CCU→UCU	Pro→Ser	C	3382	37	[1, 232, 1, 3148]	CT CA CG	0.93
rps3	1619	540	UCA→UUA	Ser→Leu	C	3141	37	[1, 119, 0, 3021]	CT CA	0.96
rps3	1626	542	GUC→GUU	Val→Val	C	2812	37	[0, 2366, 0, 446]	CT	0.16
rps4	50	17	UCA→UUA	Ser→Leu	C	788	37	[0, 77, 0, 711]	CT	0.9
rps4	61	21	CGG→UGG	Arg→Trp	C	874	37	[0, 66, 0, 808]	CT	0.92
rps4	145	49	CCG→UCG	Pro→Ser	C	1179	37	[0, 60, 0, 1119]	CT	0.95
rps4	176	59	UCA→UUA	Ser→Leu	C	1008	37	[0, 66, 0, 942]	CT	0.93
rps4	196	66	CCC→UCC	Pro→Ser	C	1120	37	[0, 67, 0, 1053]	CT	0.94
rps4	205	69	CAU→UAU	His→Tyr	C	1122	37	[0, 95, 0, 1027]	CT	0.92
rps4	269	90	CCA→CUA	Pro→Leu	C	1155	37	[0, 69, 0, 1086]	CT	0.94
rps4	278	93	CCA→CUA	Pro→Leu	C	1176	37	[0, 87, 0, 1089]	CT	0.93
rps4	302	101	CCG→CUG	Pro→Leu	C	1272	37	[0, 102, 0, 1170]	CT	0.92
rps4	319	107	CGU→UGU	Arg→Cys	C	1288	37	[0, 309, 0, 979]	CT	0.76
rps4	347	116	CCG→CUG	Pro→Leu	C	1309	37	[0, 137, 0, 1172]	CT	0.9
rps4	494	165	UCA→UUA	Ser→Leu	C	1055	37	[0, 68, 0, 987]	CT	0.94
rps4	848	283	UCG→UUG	Ser→Leu	C	1531	37	[0, 1372, 0, 159]	CT	0.1
rps4	852	284	ACC→ACU	Thr→Thr	C	1541	37	[0, 670, 0, 871]	CT	0.57
rps4	861	287	UCC→UCU	Ser→Ser	C	1490	37	[0, 1174, 0, 316]	CT	0.21
rps4	913	305	CCU→UCU	Pro→Ser	C	1152	37	[0, 966, 0, 186]	CT	0.16
rps4	926	309	UCG→UUG	Ser→Leu	C	979	37	[0, 36, 0, 943]	CT	0.96
rps4	937	313	CAU→UAU	His→Tyr	C	1133	37	[0, 154, 0, 979]	CT	0.86
rps4	947	316	CCA→CUA	Pro→Leu	C	1411	37	[1, 993, 0, 417]	CT CA	0.3
rps4	962	321	UCU→UUU	Ser→Phe	C	1394	37	[0, 69, 0, 1325]	CT	0.95
rps4	1013	338	CCA→CUA	Pro→Leu	C	1295	37	[0, 22, 0, 1273]	CT	0.98
rps4	1022	341	CCU→CUU	Pro→Leu	C	1258	37	[0, 66, 0, 1192]	CT	0.95
rps4	1027	343	CGG→UGG	Arg→Trp	C	1258	37	[0, 168, 0, 1090]	CT	0.87
sdh3	103	35	CCA→UCA	Pro→Ser	C	3103	37	[0, 101, 0, 3002]	CT	0.97
sdh3	110	37	UCC→UUC	Ser→Phe	C	3054	37	[0, 270, 0, 2784]	CT	0.91
sdh4	171	57	AUC→AUU	Ile→Ile	C	6237	37	[0, 4297, 0, 1940]	CT	0.31
sdh4	353	118	UCU→UUU	Ser→Phe	C	1048	37	[0, 465, 0, 583]	CT	0.56

## Sheet: Table S10
Table S10 Information of each species in the phylogenetic tree.
Species	Accession number
Aglaia odorata	OR680718.1
Cotinus coggygria	NC_064986.1
Toona ciliata	NC_065060.1
Toona sinensis	NC_065061.1
Mangifera longipes	NC_060990.1
Nitraria tangutorum	MK431824.1
Acer miaotaiense	MZ636518.1
Acer truncatum	MZ318049.1
Citrus unshiu	NC_057142.1
Citrus maxima	NC_057143.1
Citrus sinensis	NC_037463.1
Spondias tuberosa	NC_045036.1
Spondias mombin	NC_045035.1
Peganum harmala	MK431826.1
Xanthoceras sorbifolium	MK333231.1
Sapindus mukorossi	NC_050850.1
Mangifera sylvatica	MZ751077.1
Mangifera persiciforma	MZ751076.1
Rhodomyrtus tomentosa	NC_071968.1
Melastoma candidum	NC_071383.1
Melastoma sanguineum	NC_071384.1
Melastoma dodecandrum	NC_071385.1
Punica granatum	NC_071229.1
Oenothera biennis strain suaveolens Grado	MZ934756.1
Oenothera villaricae strain berteriana Schwemmle	MZ934755.1
Oenothera elata subsp. hookeri strain johansen Standard	MZ934757.1
Medinilla magnifica	MT043351.1
Eucalyptus grandis	NC_040010.1
Lagerstroemia indica	NC_035616.1
Stylosanthes capitata	NC_063515.1
Glycine max	NC_020455.1
